# Supplementary material
Source: publisher figshare collection journal article supplement (https://frontiersin.figshare.com/ndownloader/files/22186539)
Supplement: Supplementary file [file 22186539]

## Supplementary Figure 10.

### A. Gate in neutrophils

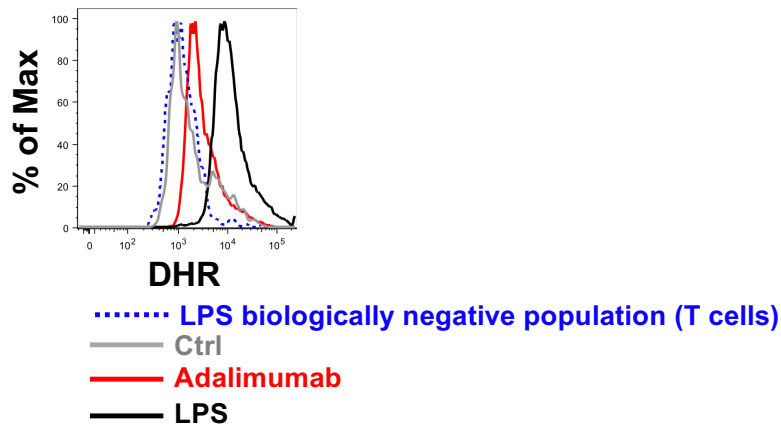

### B.

#### Gate in neutrophils

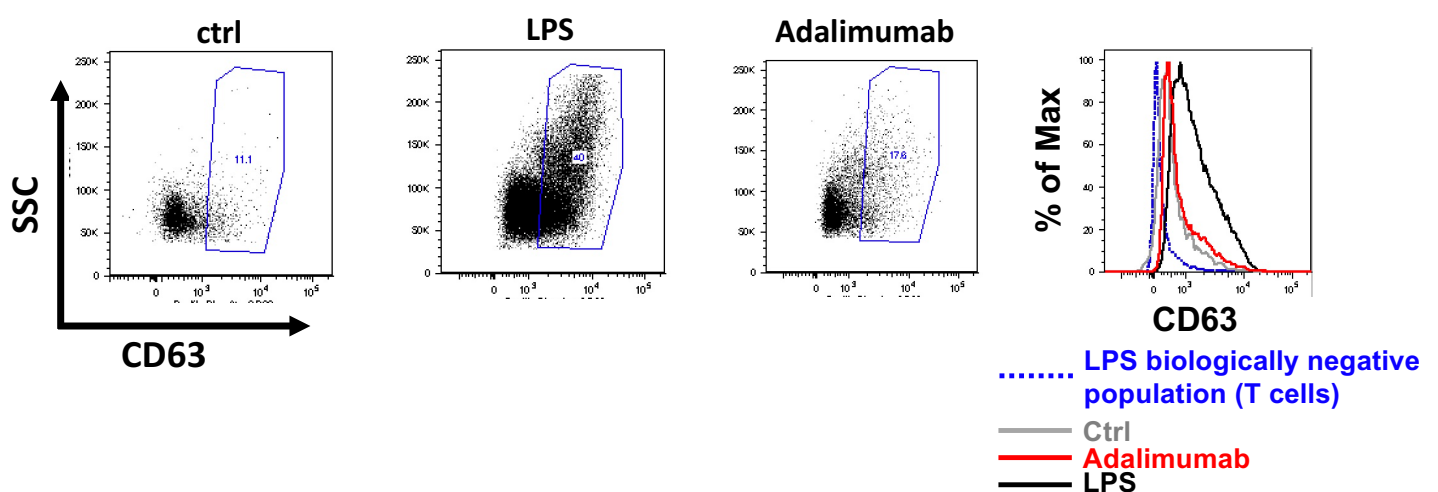

### C.

#### Gate in neutrophils

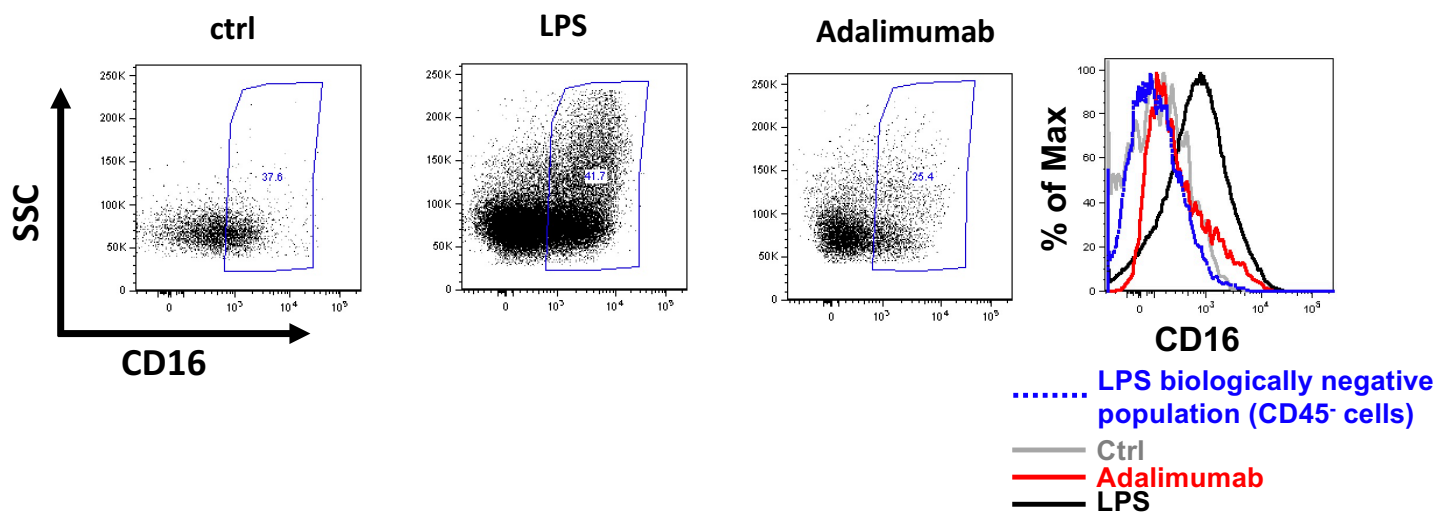

**Supplementary Figure 10.** Representative dot plots (n=5) showing activation of chorio-decidua Neutrophils. Chorio-decidua cell suspension were analyzed by flow cytometry. Representative mean fluorescence intensity (MFI) of **(A)** Dihydrorhodamine 123 (DHR) - an uncharged and nonfluorescent reactive oxygen species indicator – and frequency and MFI of **(B)** CD63<sup>+</sup>, and **(C)** CD16<sup>+</sup> neutrophils decreased upon Adalimumab treatment.
